# Supplementary material
Source: PubMed Central journal article supplement (PMC3116415)
Supplement: 1106136108_pnas.201106136SI.pdf [file 1106136108_pnas.201106136SI.pdf]

# Supporting Information

Emanuele et al. 10.1073/pnas.1106136108

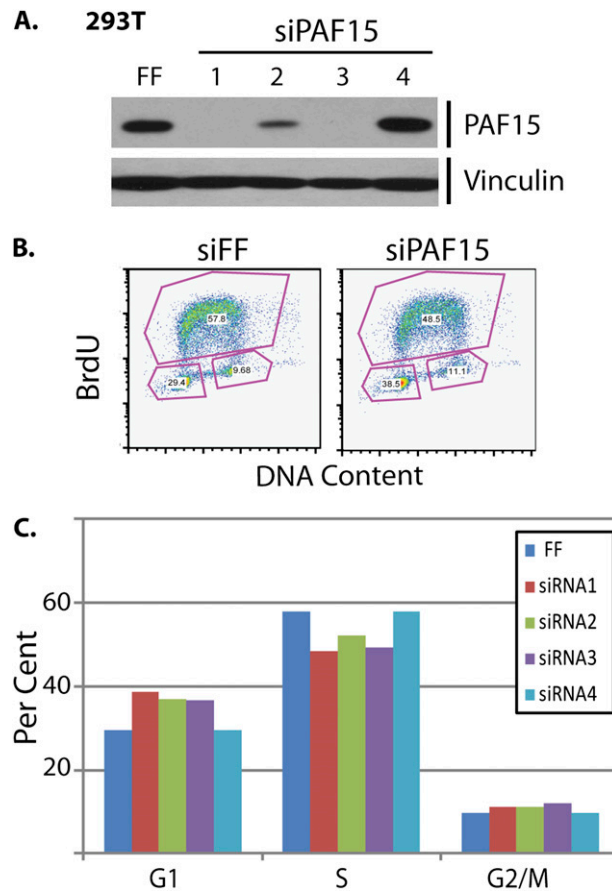

**Fig. S1.** PAF15 is involved in cell cycle progression in 293T cells. Depletion of PAF15 from 293T cells caused a decrease in BrdU-labeled S-phase cells. (A) Western blot for PAF15 following depletion with four independent siRNA. (B) Flow cytometric analysis of BrdU-labeled cells treated with siRNA targeting firefly luciferase or PAF15. (C) Quantification of BrdU-labeling experiment for cells in G1, S, and G2/M phases.

## Other Supporting Information Files

[Table S1 \(XLSX\)](#)

[Table S2 \(XLSX\)](#)

[Table S3 \(XLSX\)](#)
